# Supplementary material
Source: publisher site journal article supplement (https://www.dovepress.com/article/361648)
Supplement: Supplementary file 1 [file get_supplementary_file.php]

**Supporting Information**

**Low Intensity Focused Ultrasound Ignited "Deep-Penetration Nanobomb" (DPNB) for Tetramodal Imaging Guided Hypoxia-Tolerant Sonodynamic therapy Against Hypoxic Tumors**

*Yuanli Luo,1 Bin Qiao,1 Chao Yang,1，2 Ping Zhang,1 Zhuoyan Xie,1 Jin Cao,1 Anyu Yang,1 Qinyanqiu Xiang,1 Haitao Ran,1 Zhigang Wang,1 Lan Hao,1 Yang Cao,1 Zhiyi Zhou,3,* Jianli Ren.1,**

1 Ultrasound Department of the Second Affiliated Hospital of Chongqing Medical University, Chongqing Key Laboratory of Ultrasound Molecular Imaging, Chongqing, 400010, P. R. China.

2 Radiology Department of Chongqing General Hospital, University of Chinese Academy of Sciences, Chongqing 400014, P. R. China.

3 General Practice Department of Chongqing General Hospital, University of Chinese Academy of Sciences, Chongqing 400014, P. R. China.

* To whom correspondence should be addressed.

E-mail: [renjianli@cqmu.edu.cn](mailto:renjianli@cqmu.edu.cn); [zzy16966@163.com](mailto:zzy16966@163.com)


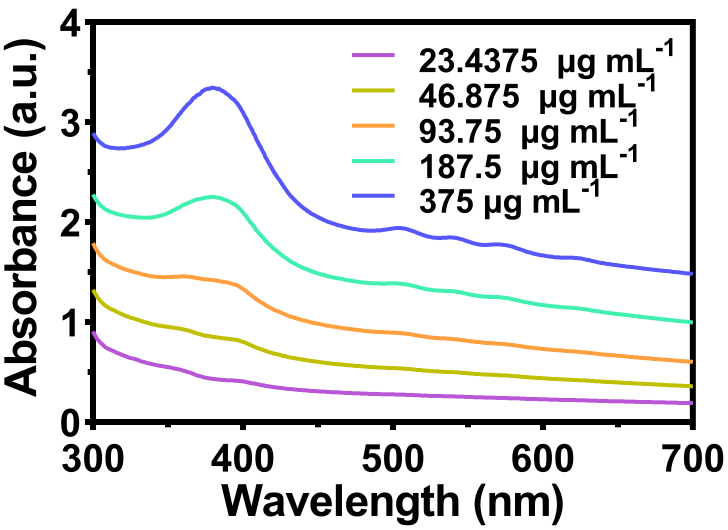


Figure S1. UV-Vis absorption spectra of different concentrations of PFP@tLyp-1-LIP-H(Gd).


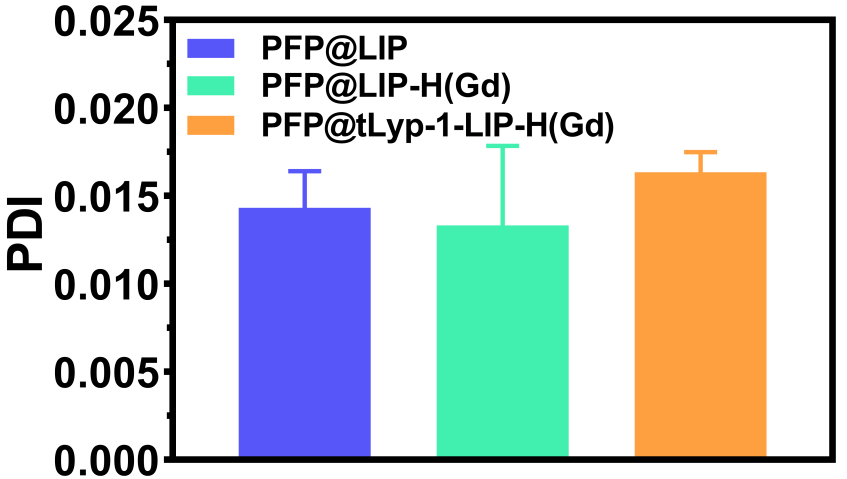


Figure S2. PDI values of PFP@LIP, PFP@LIP-H(Gd) and PFP@tLyp-1-LIP-H(Gd).


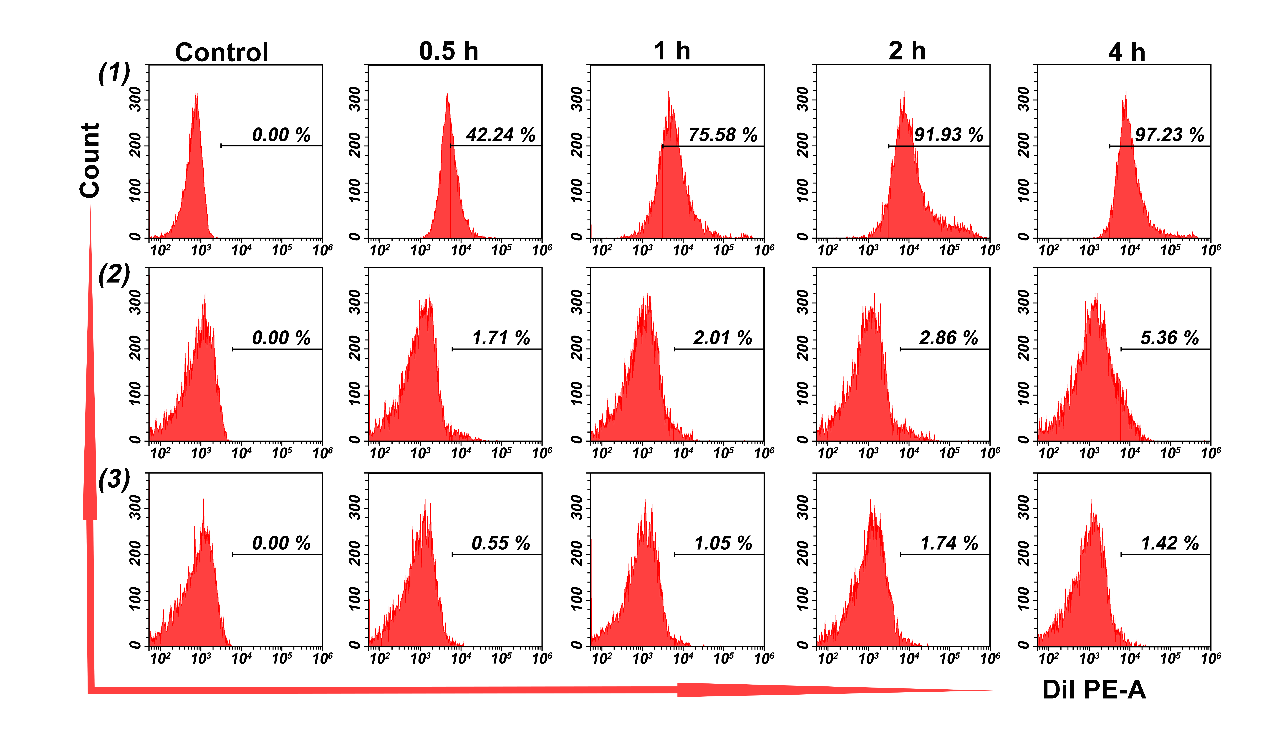


Figure S3. Uptake of (1) PFP@tLyP-1-LIP-H(Gd) and (2) PFP@LIP-H(Gd) by MDA-MB-231 cells or (3) PFP@tLyP-1-LIP-H(Gd) by HUVEC cells at different incubation times observed by flow-cytometry analysis.


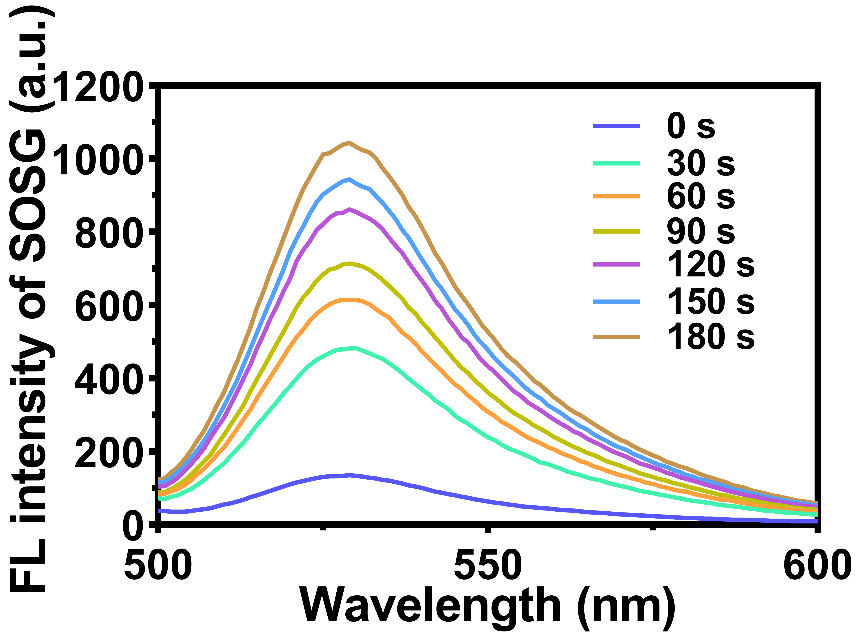


Figure S4. Fluorescence spectrum of SOSG under a prolonged LIFU irradiation at a fixed PFP@tLyp-1-LIP-H(Gd) concentration (0.75 mg mL-1).


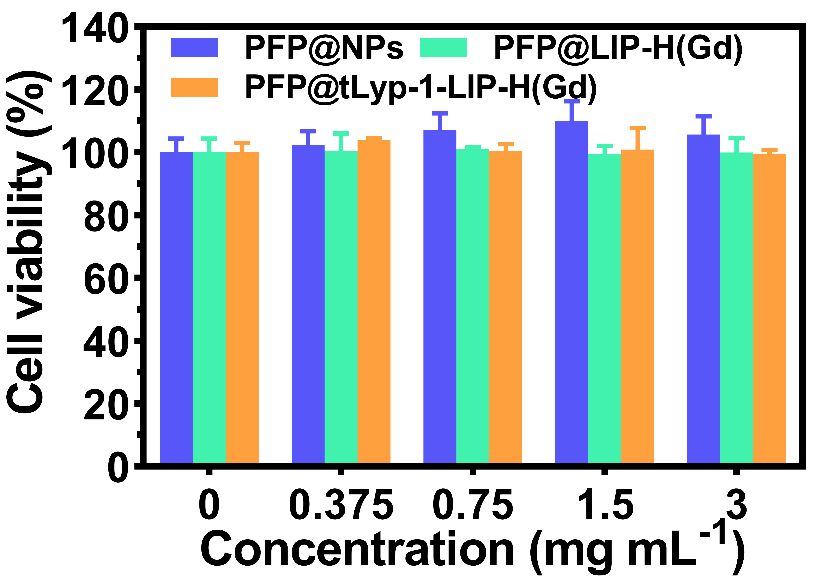


Figure S5. Cell viability of MDA-MB-231 cells after treatment with PFP@LIP, PFP@LIP-H(Gd) and PFP@tLyp-1-LIP-H(Gd).


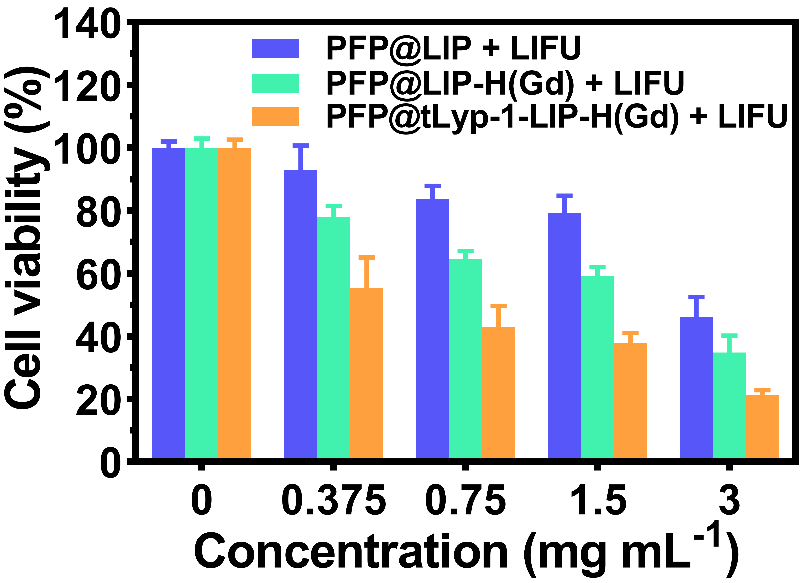


Figure S6. Cell viability of MDA-MB-231 cells after treatment with PFP@LIP, PFP@LIP-H(Gd) and PFP@tLyp-1-LIP-H(Gd) followed by LIFU irradiation (1.6 W cm-2, 3 min).


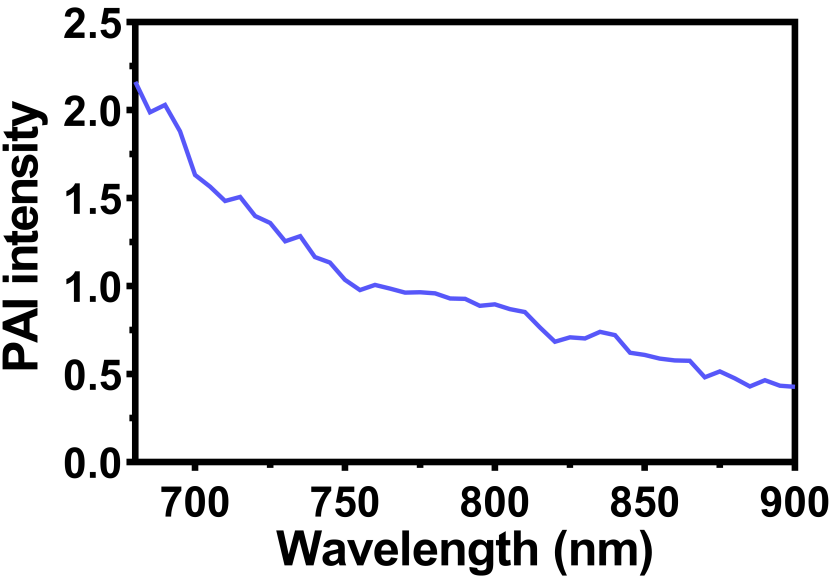


Figure S7. PA signal of PFP@tLyp-1-LIP-H(Gd) at different excitation wavelength of 680-900 nm.


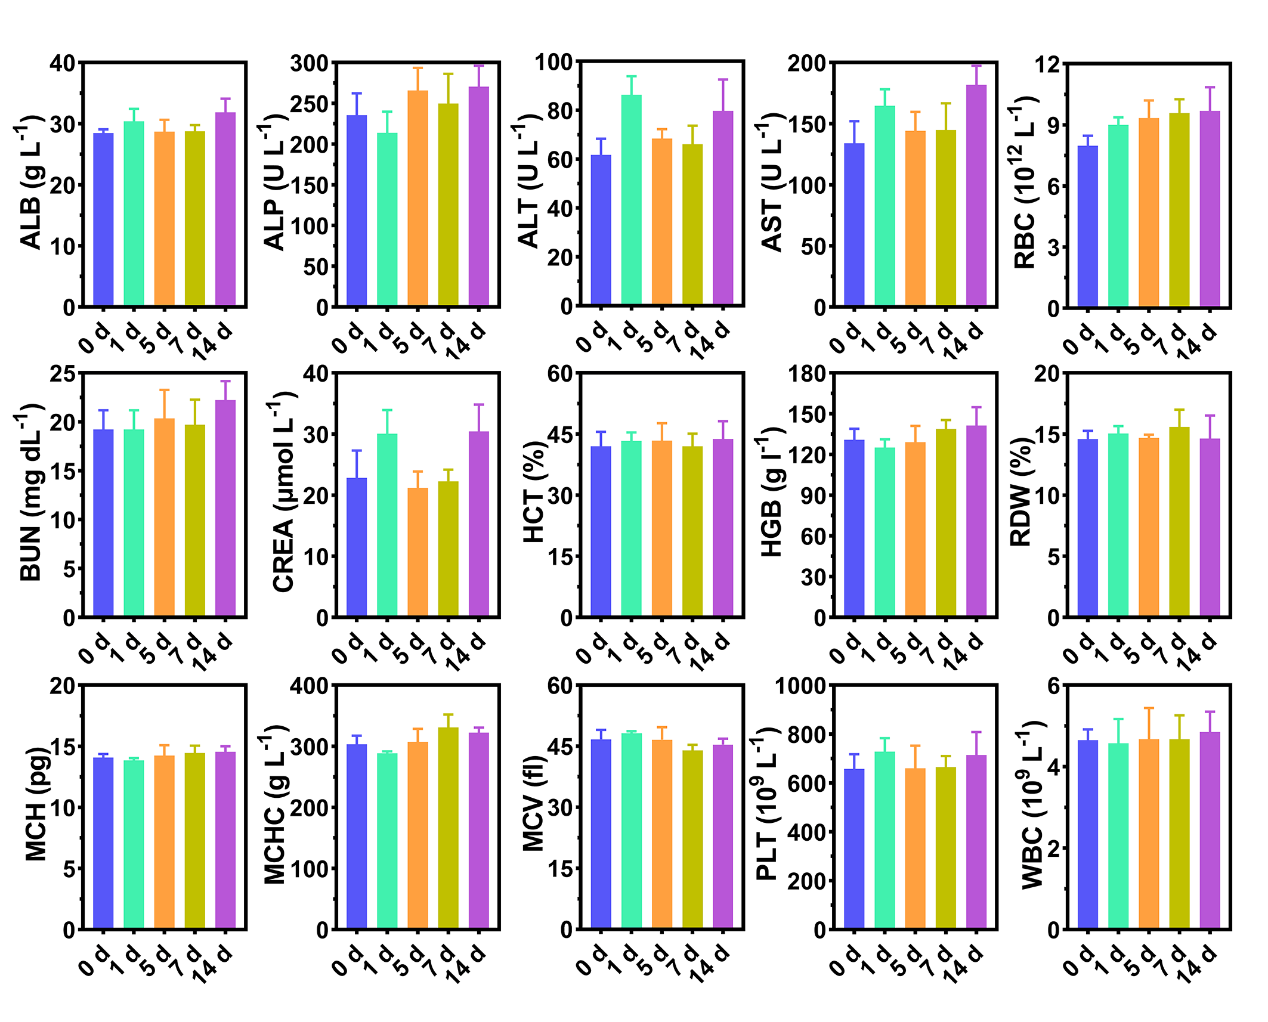


Figure S8. The hematological assays of mice post-treated with PFP@tLyp-1-LIP-H(Gd) at different times (0 d, 1 d, 5 d, 7 d and 14 d).
